# Supplementary material for: Hydrogen atom transfer in the oxidation of alkylbenzenesulfonates by ferrate(vi) in aqueous solutions
Source: Royal Society of Chemistry journal article supplement (doi:10.1039/d0dt03245j), 2020-11-26
Supplement: d0dt03245j1.pdf [file d0dt03245j1.pdf]

**Electronic Supplementary Material (ESI) for Dalton Transactions.**

**This journal is © The Royal Society of Chemistry 2020**

**Supporting Information**

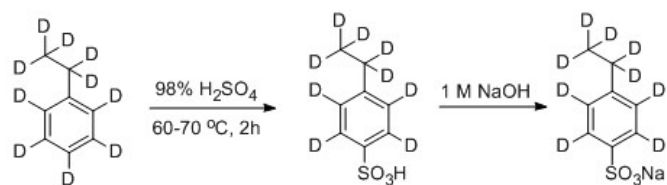

**Scheme S1** Synthesis of sodium 4-ethylbenzenesulfonate-d<sub>9</sub>.

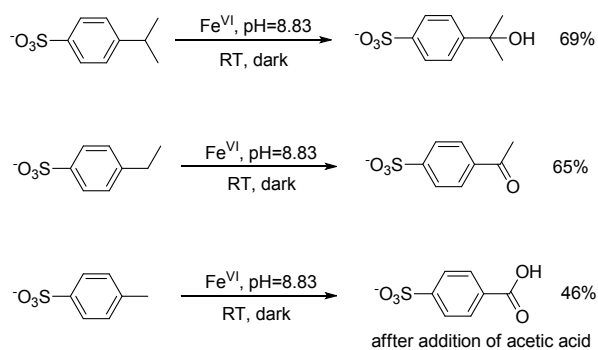

**Scheme S2** Oxidation of alkylbenzenesulfonates by ferrate at pH = 8.83.

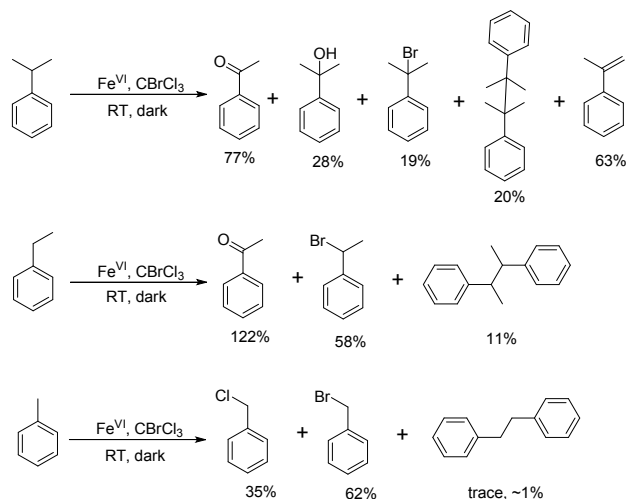

**Scheme S3** The products in the organic phase for the oxidation of alkylarenes by ferrate at pH = 8.67.

**Table S1** Second-order rate constants of the oxidation of 4-isopropylbenzenesulfonate by ferrate at 25 °C and  $I = 0.3$  M.

| pH   | $k_2 / \text{M}^{-1} \text{s}^{-1}$ |
|------|-------------------------------------|
| 7.45 | $(2.24 \pm 0.07) \times 10^{-1}$    |
| 7.83 | $(1.17 \pm 0.04) \times 10^{-1}$    |
| 8.11 | $(7.63 \pm 0.38) \times 10^{-2}$    |
| 8.35 | $(4.18 \pm 0.17) \times 10^{-2}$    |
| 8.51 | $(3.13 \pm 0.12) \times 10^{-2}$    |
| 8.83 | $(1.77 \pm 0.06) \times 10^{-2}$    |
| 9.01 | $(1.52 \pm 0.01) \times 10^{-2}$    |
| 9.63 | $(8.51 \pm 0.18) \times 10^{-3}$    |

**Table S2** Second-order rate constants of the oxidation of 4-isopropylbenzenesulfonate by ferrate at 25 °C and pH = 8.35.

| $I / \text{M}$ | $k_2 / \text{M}^{-1} \text{s}^{-1}$ |
|----------------|-------------------------------------|
| 0.15           | $(3.37 \pm 0.11) \times 10^{-2}$    |
| 0.30           | $(4.18 \pm 0.17) \times 10^{-2}$    |
| 0.60           | $(5.03 \pm 0.15) \times 10^{-2}$    |
| 0.80           | $(5.73 \pm 0.33) \times 10^{-2}$    |

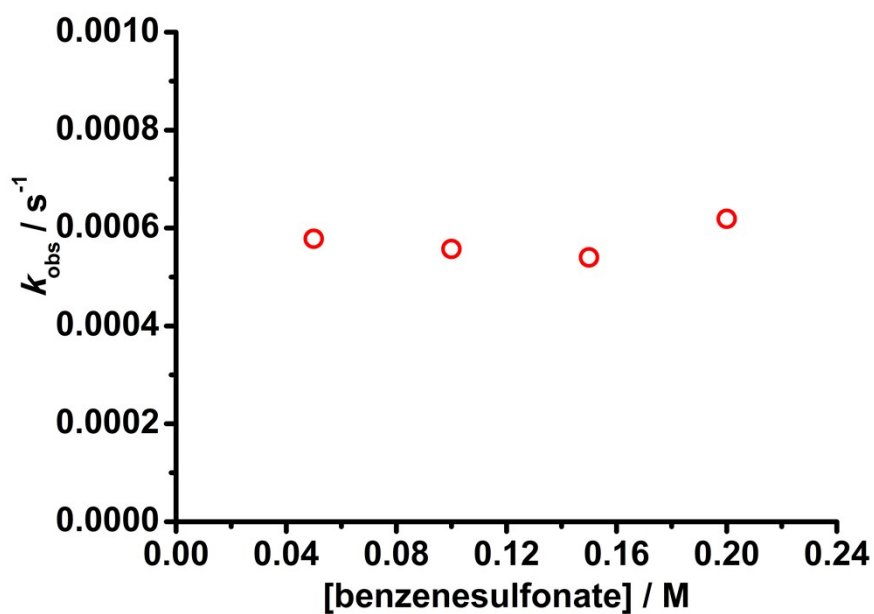

**Fig. S1** Plot of  $k_{\text{obs}}$  vs [benzenesulfonate] for the oxidation of benzenesulfonate by ferrate at 25 °C, pH=8.83 and  $I = 0.3$  M.

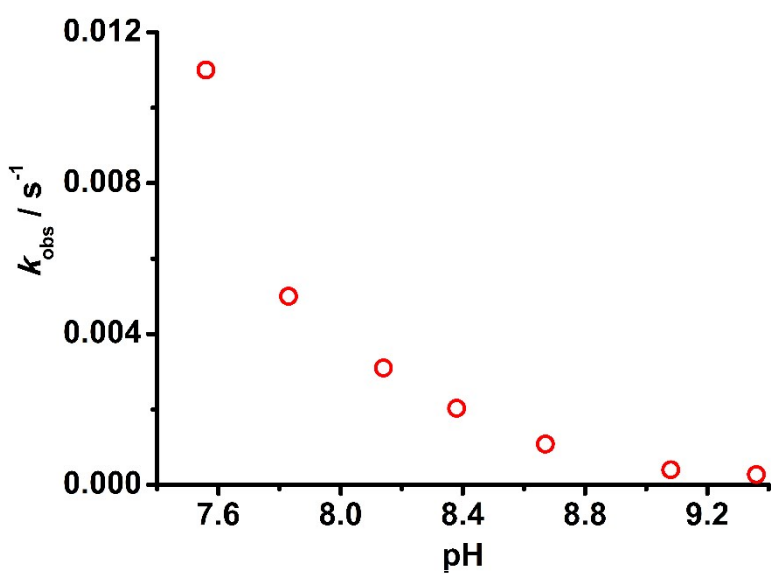

**Fig. S2** Plot of  $k_{\text{obs}}$  vs. pH for the self-decomposition of ferrate(VI) at  $I = 0.3$  M and 25 °C.

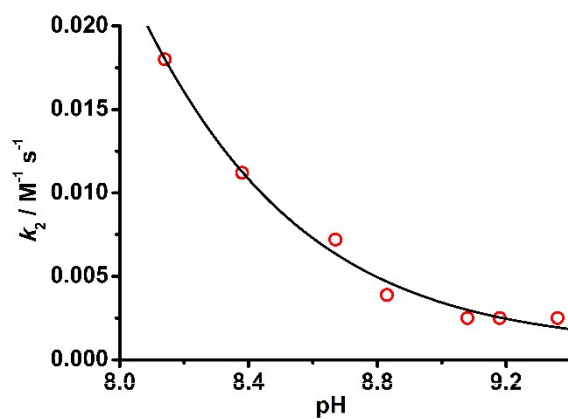

**Fig. S3** Plot of  $k_2$  vs. pH for the oxidation of 4-methylbenzenesulfonate by ferrate(VI) at  $I = 0.3 \text{ M}$  and  $25 \text{ }^\circ\text{C}$ . The solid line represents the fit of the experimental data according to eqn (7).

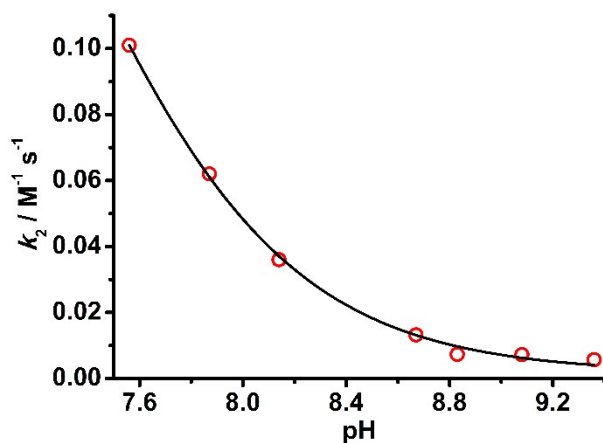

**Fig. S4** Plot of  $k_2$  vs. pH for the oxidation of 4-ethylbenzenesulfonate by ferrate(VI) at  $I = 0.3 \text{ M}$  and  $25 \text{ }^\circ\text{C}$ . The solid line represents the fit of the experimental data according to eqn (7).

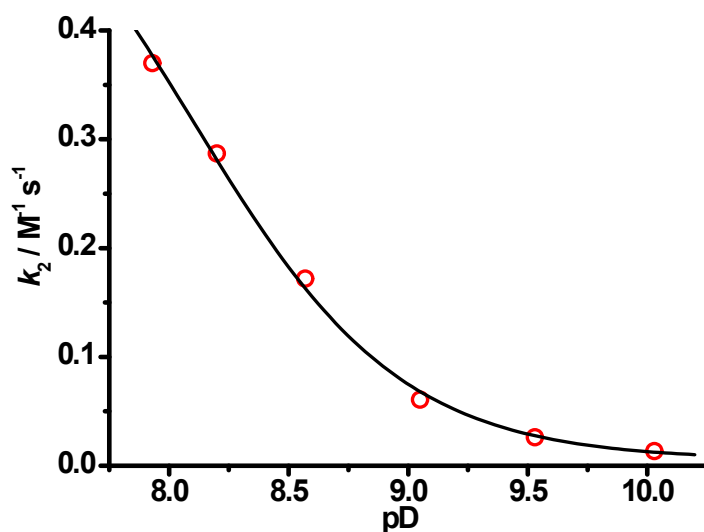

**Fig. S5** Plot of  $k_2$  vs. pD for the oxidation of 4-isopropylbenzenesulfonate by ferrate(VI) in  $\text{D}_2\text{O}$  at  $I = 0.3 \text{ M}$  and  $25 \text{ }^\circ\text{C}$ . The solid line represents the fit of the experimental data according to eqn 7.

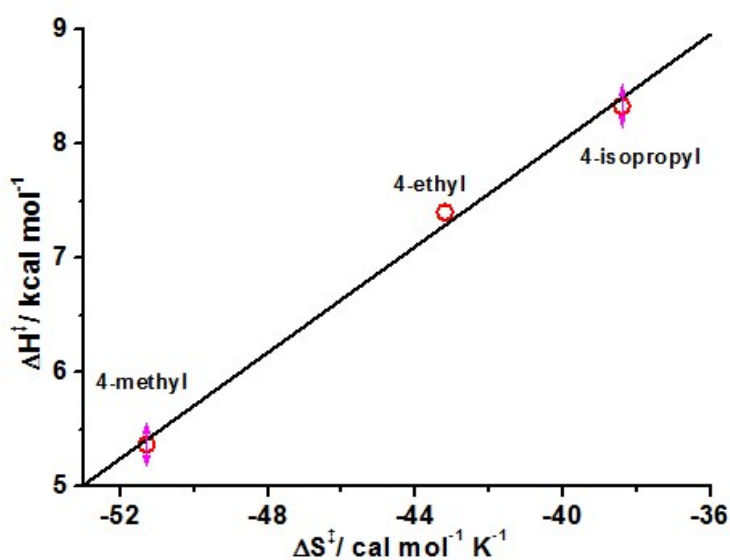

**Fig. S6** Plot of  $\Delta H^\ddagger$  versus  $\Delta S^\ddagger$  for the oxidation of alkylbenzenesulfonates by ferrate at  $\text{pH}=8.83$  and  $I = 0.3 \text{ M}$  [slope =  $0.23 \pm 0.02$ ; y-intercept =  $(1.73 \pm 0.07) \times 10^1$ ;  $r^2 = 0.992$ ]

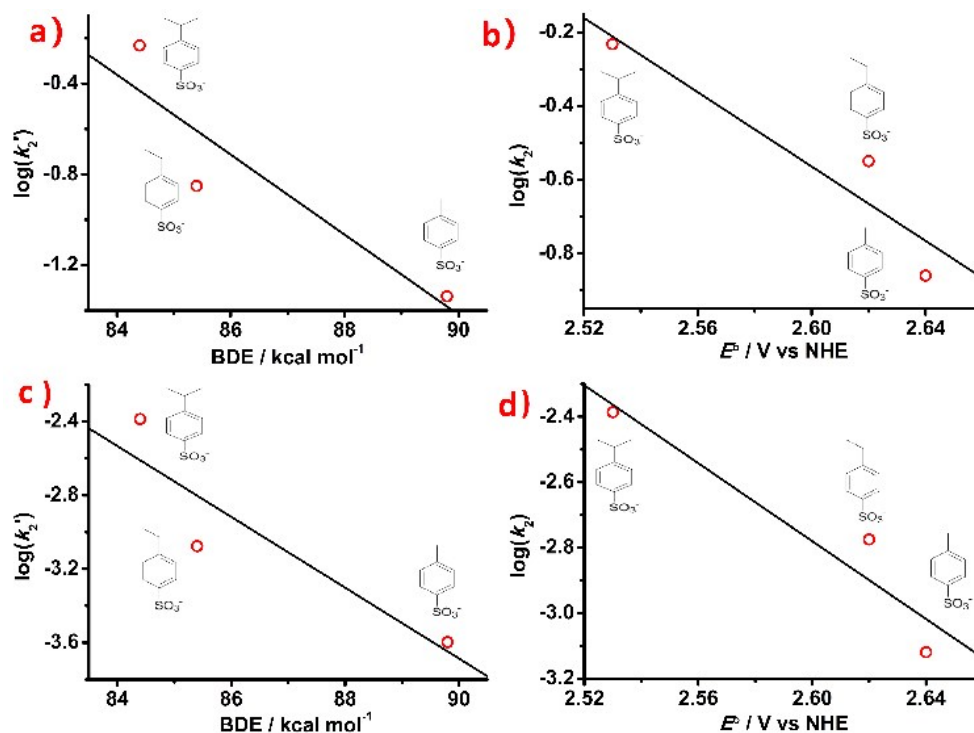

**Fig. S7** a) Plot of  $\log k_2'$  vs BDEs of alkyl benzenesulfonates for the reactions with  $[\text{Fe}(\text{O})_3(\text{OH})]^-$  [slope =  $-(0.17 \pm 0.07)$ ; y-intercept =  $(14.4 \pm 6.7)$ ]. b) Plot of  $\log k_2$  vs  $E^0$  of alkylbenzenesulfonates for the reactions with  $[\text{Fe}(\text{O})_3(\text{OH})]^-$  [slope =  $-(5.04 \pm 1.81)$ ; y-intercept =  $(12.5 \pm 4.7)$ ]. c) Plot of  $\log k_2'$  vs BDEs of alkylbenzenesulfonates for the reactions with  $[\text{FeO}_4]^{2-}$  [slope =  $-(0.19 \pm 0.09)$ ; y-intercept =  $(13.6 \pm 7.6)$ ]. d) Plot of  $\log k_2$  vs  $E^0$  of alkyl benzenesulfonates for the reactions with  $[\text{FeO}_4]^{2-}$  [slope =  $-(5.96 \pm 1.95)$ ; y-intercept =  $(12.7 \pm 5.1)$ ].

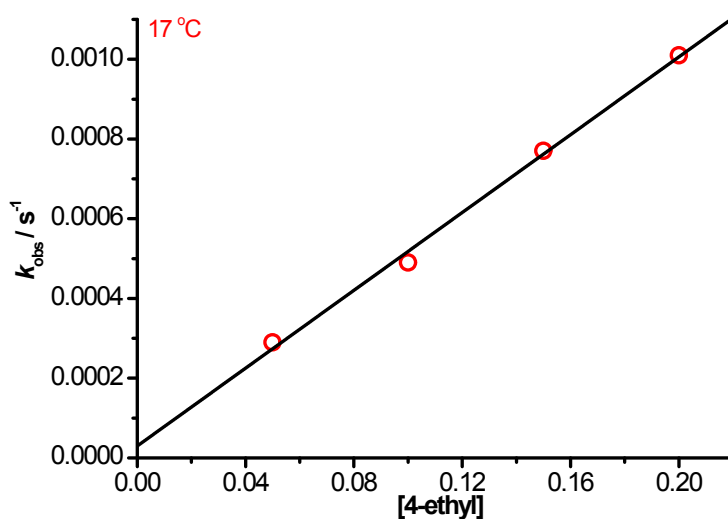

**Fig. S8** Plot of  $k_{\text{obs}}$  vs  $[4\text{-ethyl}]$  for the oxidation of 4-ethylbenzenesulfonate by ferrate at 17 °C, pH=8.83 and  $I = 0.3 \text{ M}$  [slope =  $(4.88 \pm 0.21) \times 10^{-3}$ ; y-intercept =  $(3.00 \pm 2.89) \times 10^{-5}$ ;  $r^2 = 0.998$ ]

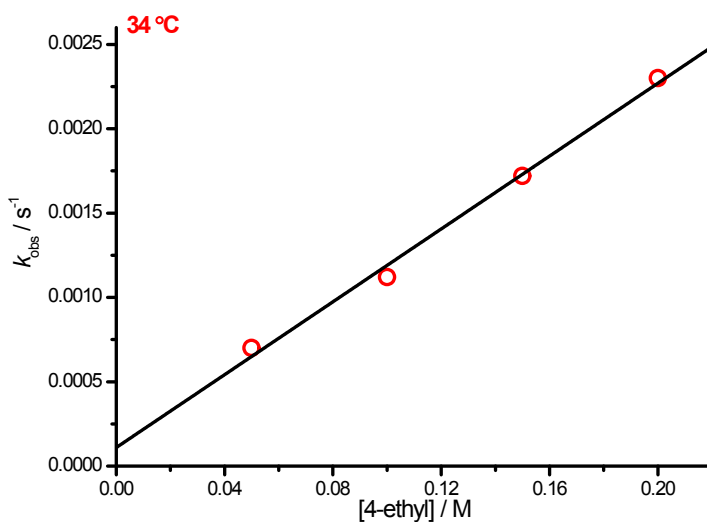

**Fig. S9** Plot of  $k_{\text{obs}}$  vs  $[4\text{-ethyl}]$  for the oxidation of 4-ethylbenzenesulfonate by ferrate at 34 °C, pH=8.83 and  $I = 0.3 \text{ M}$  [slope =  $(1.08 \pm 0.06) \times 10^{-2}$ ; y-intercept =  $(1.10 \pm 0.79) \times 10^{-4}$ ;  $r^2 = 0.998$ ].



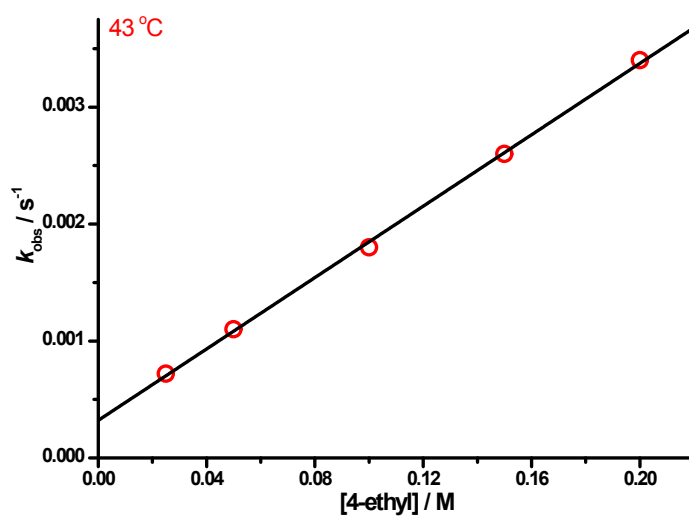

**Fig. S10** Plot of  $k_{\text{obs}}$  vs [4-ethyl] for the oxidation of 4-ethylbenzenesulfonate by ferrate at 43 °C, pH=8.83 and  $I = 0.3 \text{ M}$  [slope =  $(1.53 \pm 0.02) \times 10^{-2}$ ; y-intercept =  $(3.21 \pm 0.30) \times 10^{-4}$ ;  $r^2 = 0.999$ ].

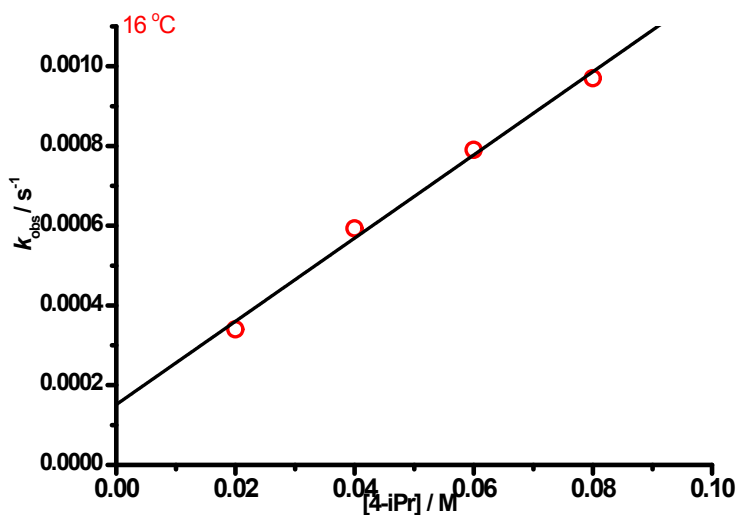

**Fig. S11** Plot of  $k_{\text{obs}}$  vs [4-isopropyl] for the oxidation of 4-isopropylbenzenesulfonate by ferrate at 16 °C, pH=8.83 and  $I = 0.3 \text{ M}$  [slope =  $(1.04 \pm 0.06) \times 10^{-2}$ ; y-intercept =  $(1.52 \pm 0.32) \times 10^{-4}$ ;  $r^2 = 0.997$ ].

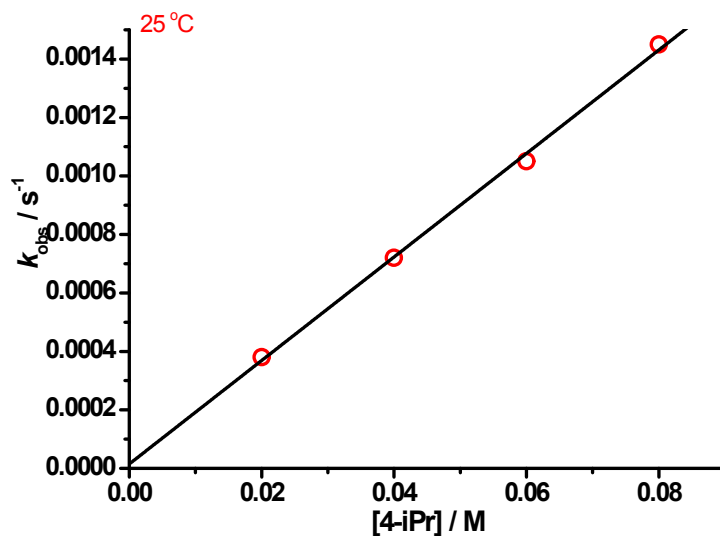

**Fig. S12** Plot of  $k_{\text{obs}}$  vs [4-isopropyl] for the oxidation of 4-isopropylbenzenesulfonate by ferrate at  $25\text{ }^{\circ}\text{C}$ ,  $\text{pH}=8.83$  and  $I = 0.3\text{ M}$  [slope =  $(1.77 \pm 0.06) \times 10^{-2}$ ; y-intercept =  $(1.50 \pm 3.02) \times 10^{-5}$ ;  $r^2 = 0.999$ ].

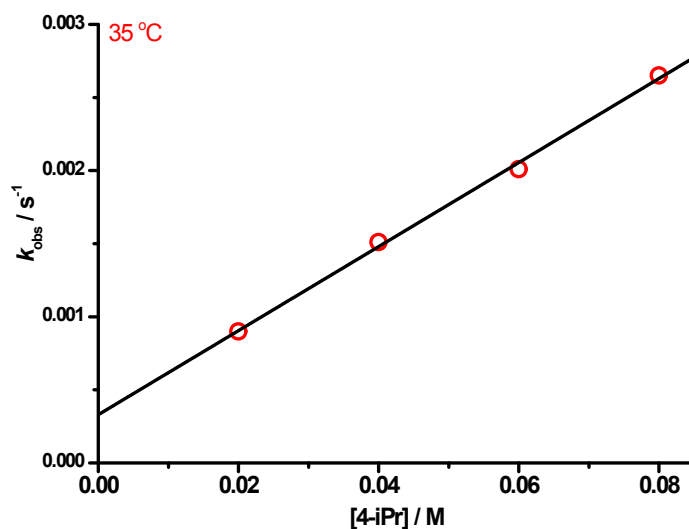

**Fig. S13** Plot of  $k_{\text{obs}}$  vs [4-isopropyl] for the oxidation of 4-isopropylbenzenesulfonate by ferrate at  $35\text{ }^{\circ}\text{C}$ ,  $\text{pH}=8.83$  and  $I = 0.3\text{ M}$  [slope =  $(2.88 \pm 0.09) \times 10^{-2}$ ; y-intercept =  $(3.30 \pm 0.50) \times 10^{-4}$ ;  $r^2 = 0.999$ ].

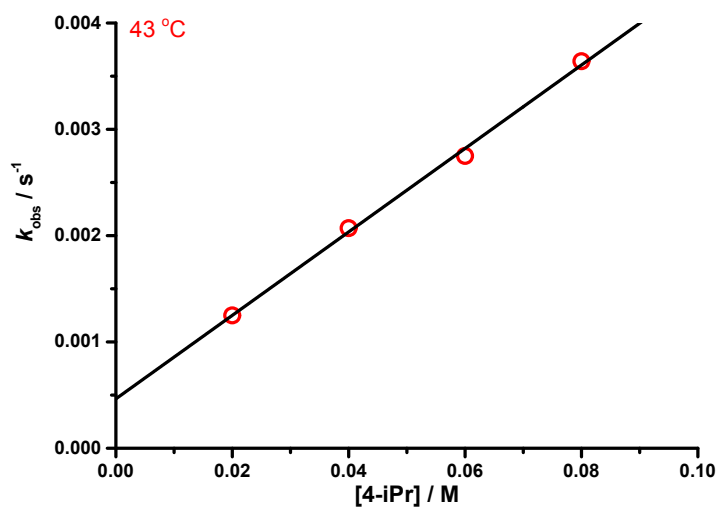

**Fig. S14** Plot of  $k_{\text{obs}}$  vs [4-isopropyl] for the oxidation of 4-isopropylbenzenesulfonate by ferrate at 35 °C, pH=8.83 and  $I = 0.3$  M [slope =  $(2.88 \pm 0.09) \times 10^{-2}$ ; y-intercept =  $(3.30 \pm 0.50) \times 10^{-4}$ ;  $r^2 = 0.999$ ].

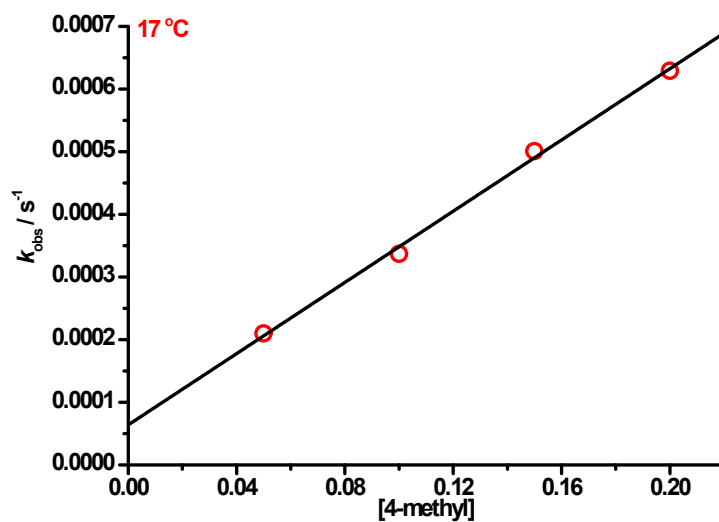

**Fig. S15** Plot of  $k_{\text{obs}}$  vs [4-methyl] for the oxidation of 4-methylbenzenesulfonate by ferrate at 17 °C, pH=8.83 and  $I = 0.3$  M [slope =  $(2.84 \pm 0.10) \times 10^{-3}$ ; y-intercept =  $(6.40 \pm 1.41) \times 10^{-5}$ ;  $r^2 = 0.999$ ].

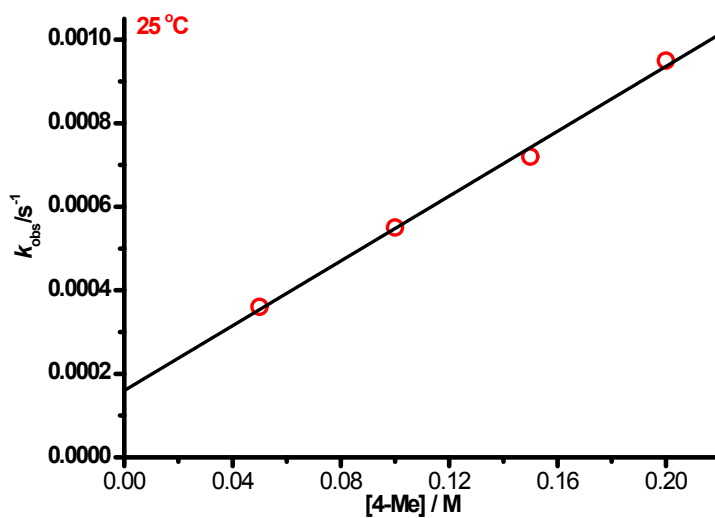

**Fig. S16** Plot of  $k_{\text{obs}}$  vs [4-methyl] for the oxidation of 4-methylbenzenesulfonate by ferrate at 25 °C, pH=8.83 and  $I = 0.3$  M [slope =  $(3.88 \pm 0.17) \times 10^{-3}$ ; y-intercept =  $(1.60 \pm 0.23) \times 10^{-4}$ ;  $r^2 = 0.998$ ].

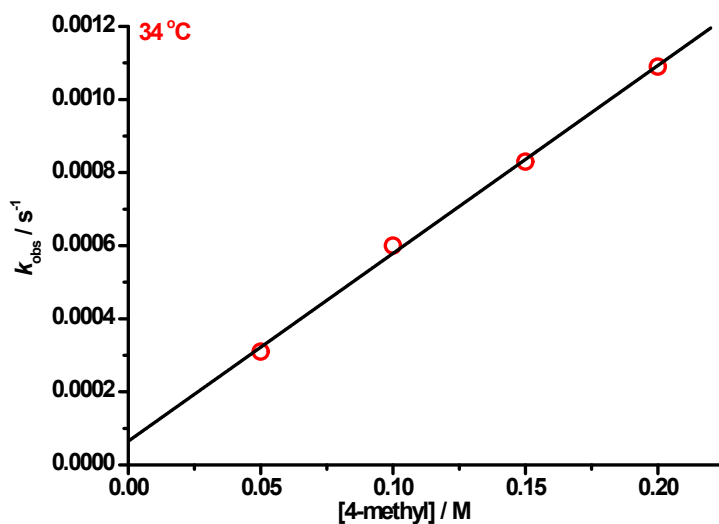

**Fig. S17** Plot of  $k_{\text{obs}}$  vs [4-methyl] for the oxidation of 4-methylbenzenesulfonate by ferrate at 34 °C, pH=8.83 and  $I = 0.3$  M [slope =  $(5.14 \pm 0.16) \times 10^{-3}$ ; y-intercept =  $(6.50 \pm 2.17) \times 10^{-5}$ ;  $r^2 = 0.999$ ].

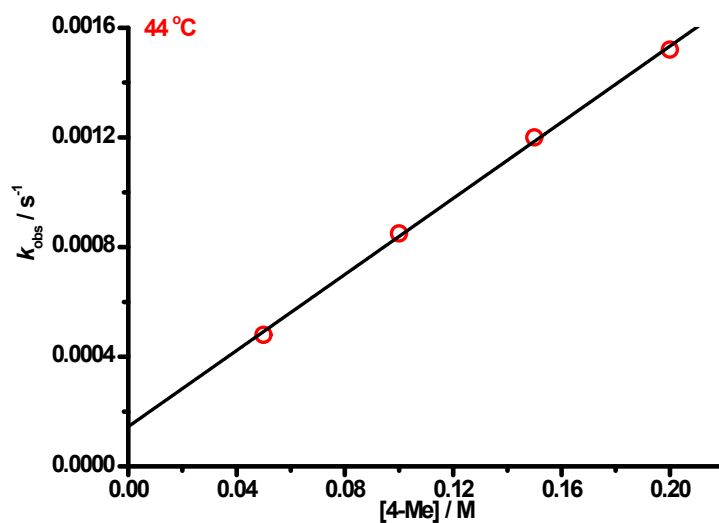

**Fig. S18** Plot of  $k_{\text{obs}}$  vs [4-methyl] for the oxidation of 4-methylbenzenesulfonate by ferrate at 44 °C, pH=8.83 and  $I = 0.3$  M [slope =  $(6.94 \pm 0.16) \times 10^{-3}$ ; y-intercept =  $(1.45 \pm 0.22) \times 10^{-4}$ ;  $r^2 = 0.999$ ].

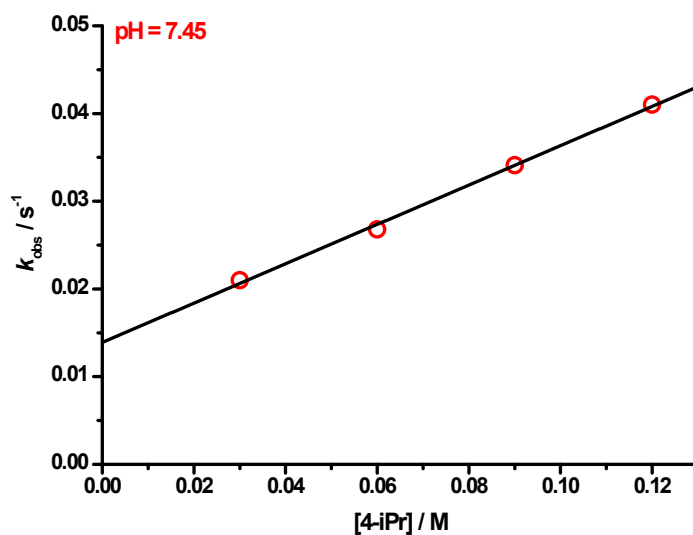

**Fig. S19** Plot of  $k_{\text{obs}}$  vs [4-isopropyl] for the oxidation of 4-isopropylbenzenesulfonate by ferrate at 25 °C, pH=7.45 and  $I = 0.3$  M [slope =  $(2.24 \pm 0.07) \times 10^{-1}$ ; y-intercept =

$(1.39 \pm 0.06) \times 10^{-2}$ ;  $r^2 = 0.999$ ].

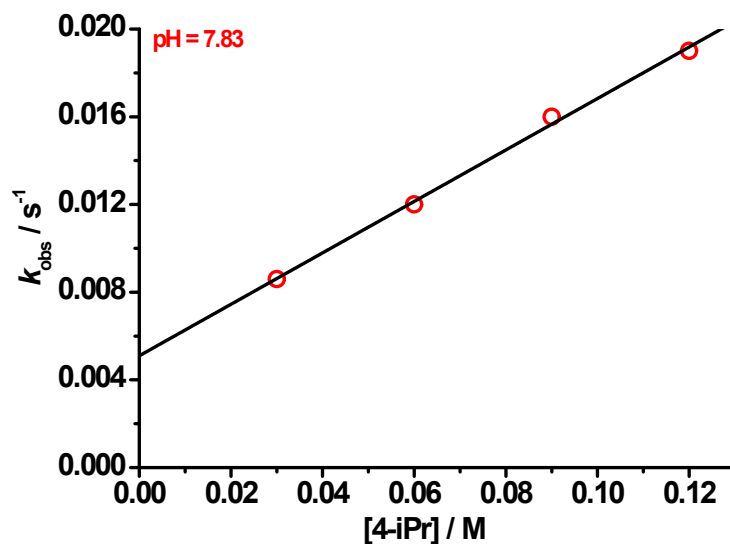

**Fig. S20** Plot of  $k_{\text{obs}}$  vs  $[4\text{-isopropyl}]$  for the oxidation of 4-isopropylbenzenesulfonate by ferrate at 25 °C, pH=7.83 and  $I = 0.3 \text{ M}$  [slope =  $(1.17 \pm 0.04) \times 10^{-1}$ ; y-intercept =  $(5.10 \pm 0.35) \times 10^{-3}$ ;  $r^2 = 0.999$ ].

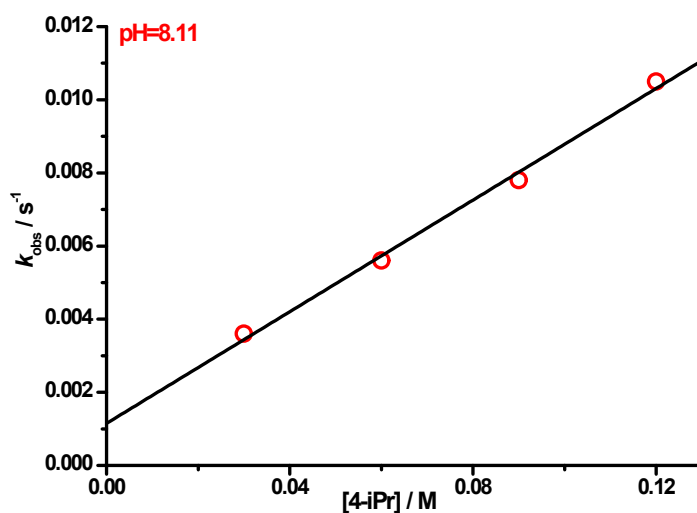

**Fig. S21** Plot of  $k_{\text{obs}}$  vs  $[4\text{-isopropyl}]$  for the oxidation of 4-isopropylbenzenesulfonate by ferrate at 25 °C, pH=8.11 and  $I = 0.3 \text{ M}$  [slope =  $(7.63 \pm 0.38) \times 10^{-2}$ ; y-intercept =

$(1.15 \pm 0.31) \times 10^{-3}$ ;  $r^2 = 0.998$ ].

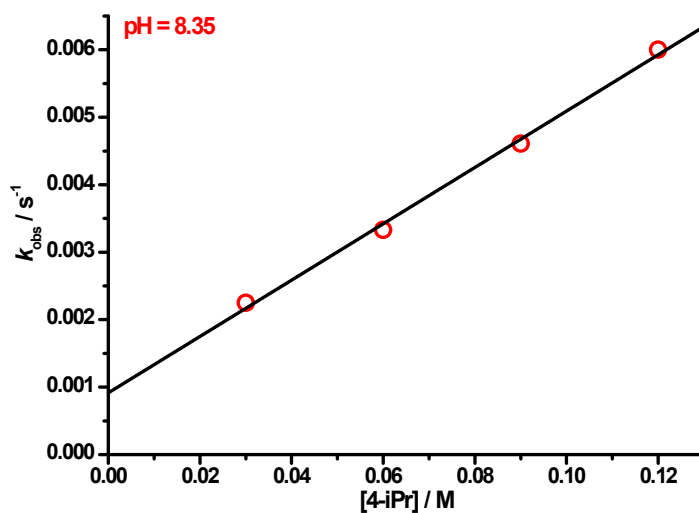

**Fig. S22** Plot of  $k_{\text{obs}}$  vs  $[4\text{-isopropyl}]$  for the oxidation of 4-isopropylbenzenesulfonate by ferrate at 25 °C, pH=8.35 and  $I = 0.3 \text{ M}$  [slope =  $(4.18 \pm 0.17) \times 10^{-2}$ ; y-intercept =  $(9.15 \pm 1.35) \times 10^{-4}$ ;  $r^2 = 0.998$ ].

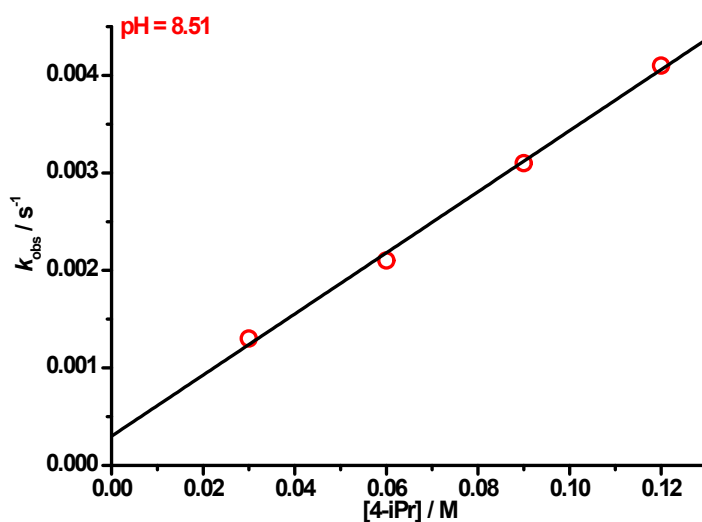

**Fig. S23** Plot of  $k_{\text{obs}}$  vs  $[4\text{-isopropyl}]$  for the oxidation of 4-isopropylbenzenesulfonate by ferrate at 25 °C, pH=8.51 and  $I = 0.3 \text{ M}$  [slope =  $(3.13 \pm 0.12) \times 10^{-2}$ ; y-intercept =

$(3.00 \pm 0.95) \times 10^{-4}$ ;  $r^2 = 0.999$ ].

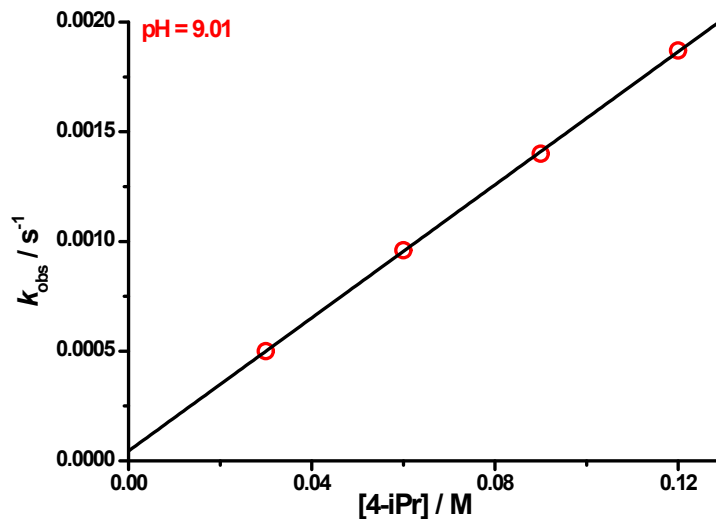

**Fig. S24** Plot of  $k_{\text{obs}}$  vs [4-isopropyl] for the oxidation of 4-isopropylbenzenesulfonate by ferrate at 25 °C, pH=9.01 and  $I = 0.3$  M [slope =  $(1.52 \pm 0.01) \times 10^{-2}$ ; y-intercept =  $(4.50 \pm 1.06) \times 10^{-4}$ ;  $r^2 = 0.999$ ].

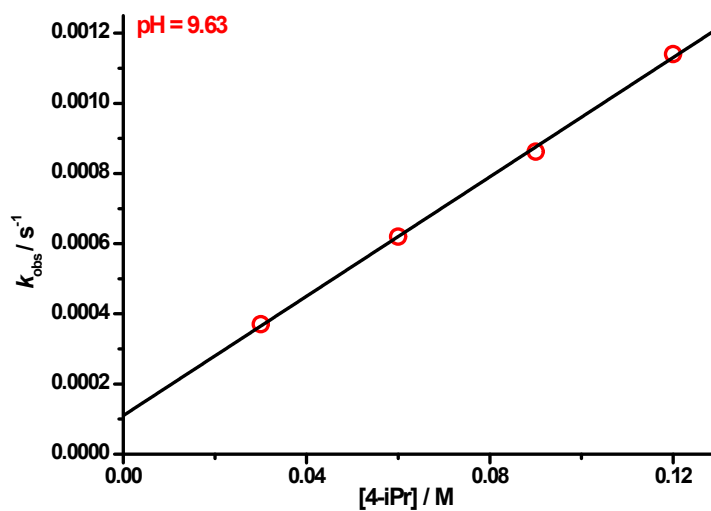

**Fig. S25** Plot of  $k_{\text{obs}}$  vs [4-isopropyl] for the oxidation of 4-isopropylbenzenesulfonate by ferrate at 25 °C, pH=9.63 and  $I = 0.3$  M [slope =  $(8.51 \pm 0.18) \times 10^{-3}$ ; y-intercept =



$(1.10 \pm 0.15) \times 10^{-4}$ ;  $r^2 = 0.999$ ].

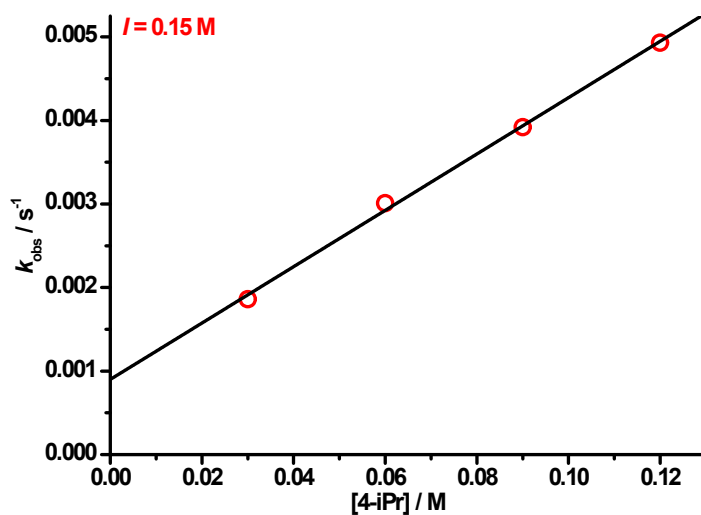

**Fig. S26** Plot of  $k_{\text{obs}}$  vs  $[4\text{-isopropyl}]$  for the oxidation of 4-isopropylbenzenesulfonate by ferrate at 25 °C, pH=8.83 and  $I = 0.15 \text{ M}$  [slope =  $(3.37 \pm 0.11) \times 10^{-2}$  y-intercept =  $(9.00 \pm 0.89) \times 10^{-4}$ ;  $r^2 = 0.999$ ].

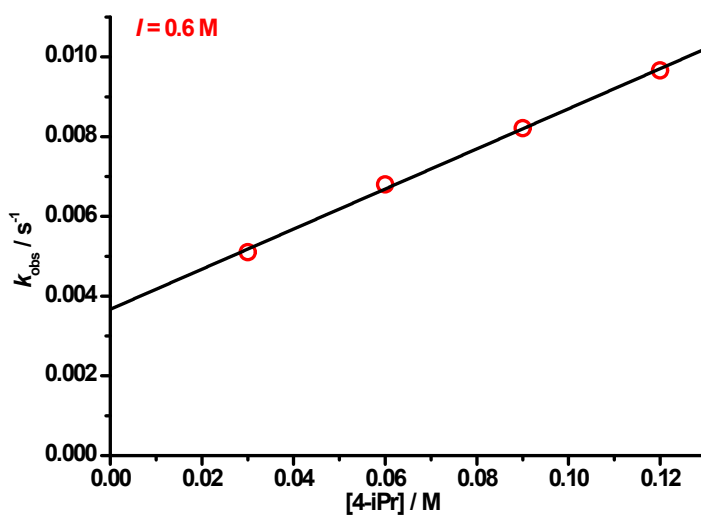

**Fig. S27** Plot of  $k_{\text{obs}}$  vs  $[4\text{-isopropyl}]$  for the oxidation of 4-isopropylbenzenesulfonate

by ferrate at 25 °C, pH=8.83 and  $I = 0.6$  M [slope =  $(5.03 \pm 0.15) \times 10^{-2}$  y-intercept =  $(3.17 \pm 0.13) \times 10^{-3}$ ;  $r^2 = 0.999$ ].

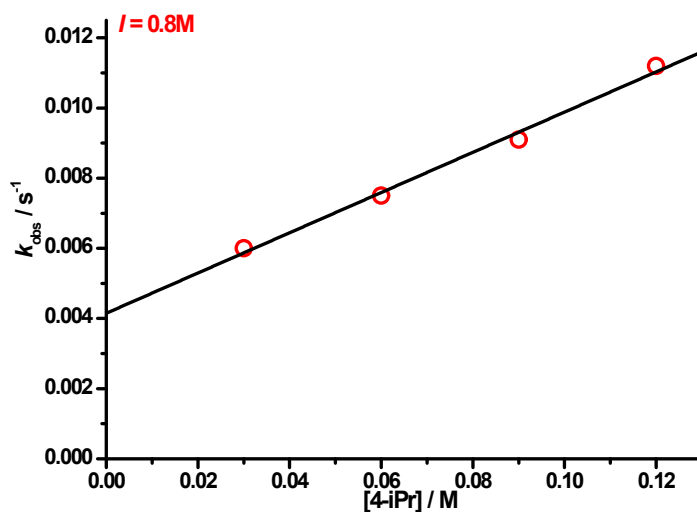

**Fig. S28** Plot of  $k_{\text{obs}}$  vs  $[4\text{-isopropyl}]$  for the oxidation of 4-isopropylbenzenesulfonate by ferrate at 25 °C, pH=8.83 and  $I = 0.8$  M [slope =  $(5.73 \pm 0.33) \times 10^{-2}$  y-intercept =  $(4.15 \pm 0.27) \times 10^{-3}$ ;  $r^2 = 0.997$ ].

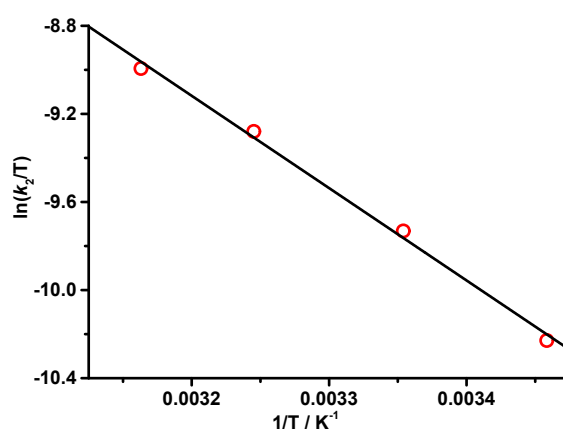

**Fig. S29** Plot of  $k_{\text{obs}}$  vs  $[4\text{-isopropyl}]$  for the oxidation of 4-isopropylbenzenesulfonate by ferrate at pH=8.83 and  $I = 0.3$  M [slope =  $-(4.19 \pm 0.19) \times 10^3$ ; y-intercept =  $(4.29 \pm 0.62)$ ;  $r^2 = 0.994$ ].

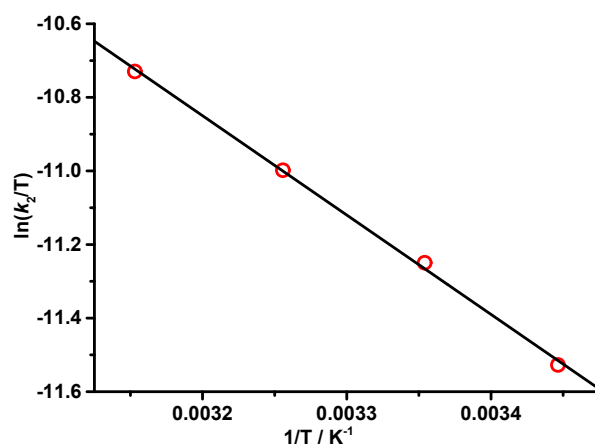

**Fig. S30** Plot of  $k_{\text{obs}}$  vs [4-methyl] for the oxidation of 4-methylbenzenesulfonate by ferrate at pH=8.83 and  $I = 0.3 \text{ M}$  [slope =  $-(2.70 \pm 0.07) \times 10^3$ ; y-intercept =  $-(2.21 \pm 0.23)$ ;  $r^2 = 0.998$ ].

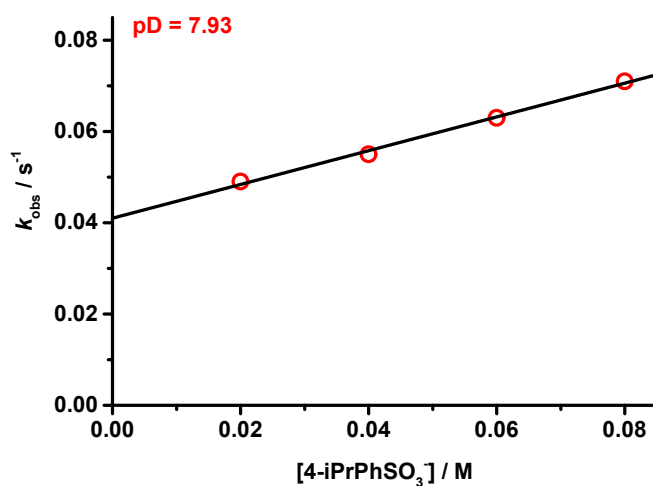

**Fig. S31** Plot of  $k_{\text{obs}}$  vs [4-iPr] for the oxidation of 4-isopropylbenzenesulfonate by ferrate at  $25 \text{ }^\circ\text{C}$ , pD = 7.93 and  $I = 0.3 \text{ M}$  [slope =  $(3.70 \pm 0.17) \times 10^{-1}$ ; y-intercept =  $(4.10 \pm 0.09) \times 10^{-2}$ ;  $r^2 = 0.998$ ]

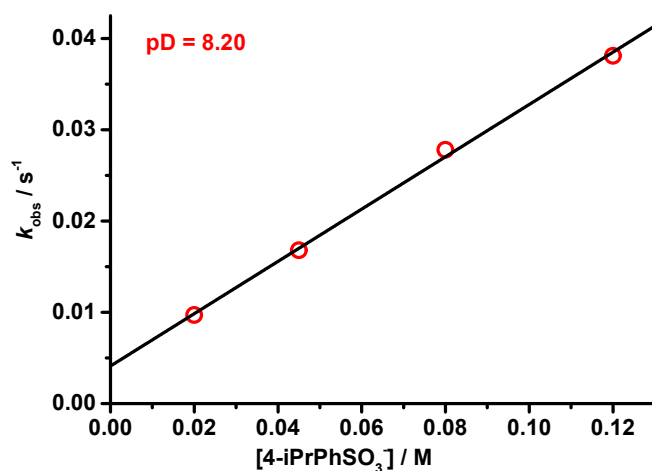

**Fig. S32** Plot of  $k_{\text{obs}}$  vs [4-iPr] for the oxidation of 4-isopropylbenzenesulfonate by ferrate at 25 °C, pD = 8.20 and  $I = 0.3$  M [slope =  $(2.87 \pm 0.08) \times 10^{-1}$ ; y-intercept =  $(4.11 \pm 0.64) \times 10^{-3}$ ;  $r^2 = 0.999$ ]

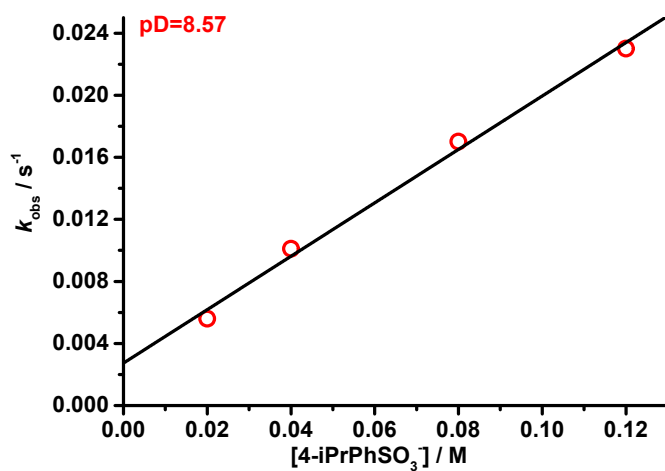

**Fig. S33** Plot of  $k_{\text{obs}}$  vs [4-iPr] for the oxidation of 4-isopropylbenzenesulfonate by ferrate at 25 °C, pD = 8.57 and  $I = 0.3$  M [slope =  $(1.72 \pm 0.09) \times 10^{-1}$ ; y-intercept =  $(2.74 \pm 0.68) \times 10^{-3}$ ;  $r^2 = 0.997$ ]

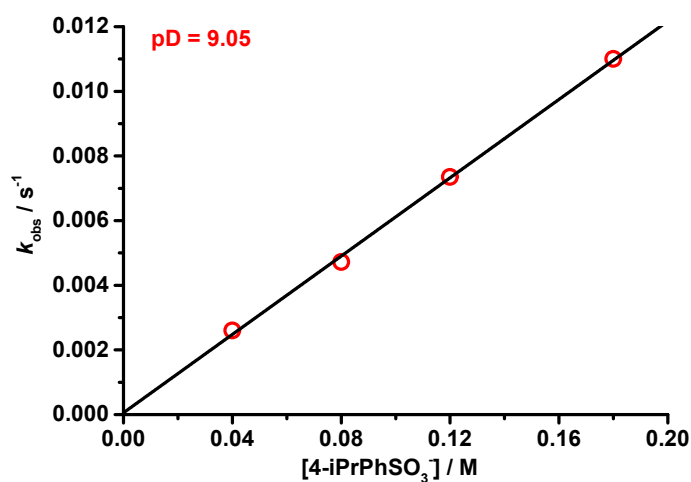

**Fig. S34** Plot of  $k_{\text{obs}}$  vs [4-iPr] for the oxidation of 4-isopropylbenzenesulfonate by ferrate at 25 °C, pD = 9.05 and  $I = 0.3$  M [slope =  $(6.06 \pm 0.15) \times 10^{-2}$ ; y-intercept =  $(0.56 \pm 1.79) \times 10^{-4}$ ;  $r^2 = 0.998$ ]

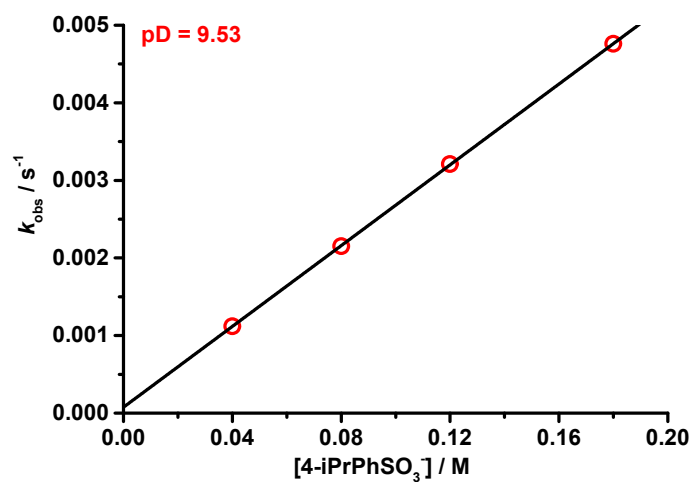

**Fig. S35** Plot of  $k_{\text{obs}}$  vs [4-iPr] for the oxidation of 4-isopropylbenzenesulfonate by ferrate at 25 °C, pD = 9.53 and  $I = 0.3$  M [slope =  $(2.60 \pm 0.01) \times 10^{-2}$ ; y-intercept =  $(7.61 \pm 1.09) \times 10^{-5}$ ;  $r^2 = 0.999$ ]

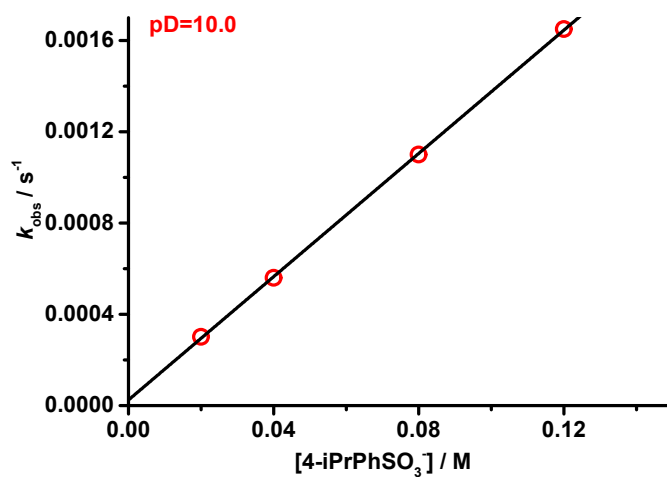

**Fig. S36** Plot of  $k_{\text{obs}}$  vs [4-iPr] for the oxidation of 4-isopropylbenzenesulfonate by ferrate at 25 °C, pD = 10.0 and  $I = 0.3$  M [slope =  $(1.35 \pm 0.01) \times 10^{-2}$ ; y-intercept =  $(2.46 \pm 0.73) \times 10^{-5}$ ;  $r^2 = 0.999$ ]

**Table S3** The cartesian coordinates of selected molecular species in the oxidation of isopropyl benzenesulfonate by  $\text{HFeO}_4^- \cdot 8\text{H}_2\text{O}$ .

**INT1**

|    |               |               |               |
|----|---------------|---------------|---------------|
| Fe | -2.4341601424 | -0.2011319709 | 0.0585011926  |
| O  | -1.8089983783 | 1.2705174234  | 0.1189271156  |
| O  | -3.1751788353 | -0.5119355964 | -1.3606221258 |
| O  | -3.4036241515 | -0.5179298505 | 1.3252973334  |
| C  | 3.9212862031  | 1.7733464642  | -0.0151488439 |
| C  | 4.8974001664  | 0.7732621413  | -0.0239312046 |
| C  | 4.5112906732  | -0.5689309227 | 0.0082220826  |
| C  | 3.1547077465  | -0.9078386438 | 0.0503045957  |
| C  | 2.1893282902  | 0.1008038335  | 0.0592448537  |
| C  | 2.5533643332  | 1.458013825   | 0.0259781074  |
| H  | 4.2398021263  | 2.8165385955  | -0.0404091874 |
| H  | 5.9558727373  | 1.0274862597  | -0.0538232492 |
| H  | 2.8499654957  | -1.9541217955 | 0.0771932419  |
| H  | 1.1344336926  | -0.176010309  | 0.0940098756  |
| C  | 1.4882734514  | 2.5453435397  | 0.0320761685  |
| H  | 0.515684024   | 2.03487807    | 0.0828562131  |
| S  | 5.7539259909  | -1.8856984522 | -0.0192912511 |
| O  | 5.4805363519  | -2.7366367777 | 1.1876304551  |
| O  | 7.0882916011  | -1.2043550587 | 0.0355013291  |
| O  | 5.5312343391  | -2.6309277057 | -1.3048003143 |
| O  | -5.2003421149 | -2.4596678385 | -1.4067085244 |
| H  | -4.4886703523 | -1.7903901848 | -1.4819937574 |
| H  | -5.0976954687 | -3.0399081524 | -2.1711729149 |
| H  | -1.3445303367 | -2.2011473437 | 0.3777550003  |
| O  | -4.4652086603 | -3.200533233  | 1.1725236031  |
| H  | -4.2457648299 | -2.2858752891 | 1.4283026657  |
| H  | -4.8321133825 | -3.0941925123 | 0.2673327168  |
| O  | -3.9117263165 | 3.2948491288  | 0.2369789164  |
| H  | -4.5463793377 | 2.7555031268  | 0.7474549786  |
| H  | -3.0862464946 | 2.7815013288  | 0.2791451361  |
| O  | -5.7816491253 | 1.2221266055  | 0.9967857969  |
| H  | -5.8204136058 | 1.2017755987  | 0.0208846072  |
| H  | -5.1176929856 | 0.5468043201  | 1.2193694804  |
| O  | -5.1469622828 | 1.6368252761  | -1.7926961658 |
| H  | -4.6715629786 | 2.3694649127  | -1.3559538949 |
| H  | -4.4873902495 | 0.9224676364  | -1.837908325  |
| O  | -1.8284513044 | -0.1487799298 | -3.8326186813 |
| H  | -2.2386072985 | -0.2475831488 | -2.9518403383 |
| H  | -1.0233439615 | 0.3597107782  | -3.6775969315 |
| O  | -2.885329835  | 0.7395999366  | 3.822032447   |

|   |               |               |               |
|---|---------------|---------------|---------------|
| H | -2.3204452261 | 1.5057975017  | 3.6654636627  |
| H | -3.0173394719 | 0.3381067884  | 2.9418979079  |
| O | -1.0472021104 | -1.2616505393 | 0.2006826502  |
| C | 1.5057460421  | 3.3693666456  | -1.2673717932 |
| H | 1.3844919243  | 2.7236002572  | -2.1481232146 |
| H | 0.6864515798  | 4.10283136    | -1.2657237668 |
| H | 2.4500155592  | 3.9223690918  | -1.3780544658 |
| C | 1.5970747832  | 3.4511299876  | 1.2707897052  |
| H | 1.5491297185  | 2.8630792588  | 2.1978020599  |
| H | 2.5414107082  | 4.0148659572  | 1.2741214417  |
| H | 0.773387363   | 4.1794896338  | 1.2849330982  |
| O | -1.8544101589 | -3.7847068365 | 0.6630876746  |
| H | -2.8137500599 | -3.7078269834 | 0.8970668587  |
| H | -1.4282344454 | -4.2390182083 | 1.4002799781  |

### TS1

|    |               |               |               |
|----|---------------|---------------|---------------|
| Fe | -1.8980401429 | -0.0927318717 | 0.2739254348  |
| O  | -1.0090630592 | 1.3430680948  | 0.2430403298  |
| O  | -2.0193243472 | -0.7410082706 | -1.2181317524 |
| O  | -3.3127520308 | 0.1198549341  | 1.0546982911  |
| C  | 3.1913311573  | 1.8770887699  | -0.4019951196 |
| C  | 4.1248608864  | 1.2385367334  | -1.2172486666 |
| C  | 4.1827802027  | -0.1586081704 | -1.2483666528 |
| C  | 3.3029582876  | -0.912926967  | -0.4652173334 |
| C  | 2.3756538567  | -0.2661981611 | 0.3523580433  |
| C  | 2.3044344924  | 1.142158561   | 0.411801087   |
| H  | 3.1696406729  | 2.9650490612  | -0.392625047  |
| H  | 4.8064826272  | 1.8312985606  | -1.8270295032 |
| H  | 3.3466953242  | -2.0002868776 | -0.5024840177 |
| H  | 1.6735597347  | -0.8621603603 | 0.9339754529  |
| C  | 1.2993707583  | 1.8092207897  | 1.3017104312  |
| H  | 0.2153222117  | 1.456515245   | 0.8214137203  |
| S  | 5.4102132399  | -0.9750278232 | -2.3031724386 |
| O  | 5.1750291222  | -0.4434273912 | -3.6861689468 |
| O  | 5.1475683061  | -2.4445813624 | -2.1836502583 |
| O  | 6.7456805302  | -0.5699320328 | -1.7502333794 |
| O  | -4.1722474785 | -2.4606456825 | -1.6352116392 |
| H  | -3.3780040561 | -1.8870885787 | -1.5629224199 |
| H  | -3.8857502617 | -3.2478049248 | -2.1144217993 |
| H  | -1.243866315  | -1.9128307259 | 1.4854425741  |
| O  | -4.5812736296 | -2.4487835824 | 1.1285626604  |
| H  | -4.30857888   | -1.5147714759 | 1.2185603256  |
| H  | -4.5682847928 | -2.5896100499 | 0.1569895055  |
| O  | -2.474973886  | 3.3852381026  | -1.065593364  |



|   |               |               |               |
|---|---------------|---------------|---------------|
| H | -3.361044706  | 3.1095928166  | -0.7636400902 |
| H | -1.8679578438 | 2.8172528508  | -0.5521157673 |
| O | -4.9085631425 | 1.8285906565  | -0.6799255318 |
| H | -4.584056588  | 1.5215136637  | -1.5476324563 |
| H | -4.5032126481 | 1.2073522543  | -0.0458969223 |
| O | -3.165815517  | 1.2958682742  | -2.9523414078 |
| H | -2.7618762891 | 2.0862762387  | -2.545197638  |
| H | -2.7215874062 | 0.5518625457  | -2.5044672169 |
| O | 0.3962088693  | -1.1923335002 | -2.613756553  |
| H | -0.4274694849 | -1.0330947529 | -2.1103165644 |
| H | 1.1070737395  | -0.9501567085 | -2.0057846082 |
| O | -3.2054449279 | 2.1080580014  | 3.0544724891  |
| H | -2.4552891631 | 2.6670194561  | 2.8190856367  |
| H | -3.223472735  | 1.4131962782  | 2.3652629847  |
| O | -0.8117401955 | -1.0462435674 | 1.2772714833  |
| C | 1.2235348835  | 3.3267720954  | 1.2212507753  |
| H | 1.0889010965  | 3.6821729919  | 0.1919705357  |
| H | 0.3811664877  | 3.6941664786  | 1.8201124155  |
| H | 2.140083889   | 3.7867359223  | 1.62460745    |
| C | 1.2567008351  | 1.2969445846  | 2.739823146   |
| H | 1.2428051174  | 0.2041544193  | 2.7980865851  |
| H | 2.1437264551  | 1.6613214805  | 3.2836531013  |
| H | 0.3657032302  | 1.6778075637  | 3.2563906607  |
| O | -2.1215052869 | -3.41546731   | 1.8550861124  |
| H | -3.0601356683 | -3.1717921933 | 1.66079748    |
| H | -2.1034965715 | -3.7034450442 | 2.7757872623  |

## INT2

|    |               |               |               |
|----|---------------|---------------|---------------|
| Fe | 2.1607068056  | -0.3968283178 | -0.0540425093 |
| O  | 1.3389011275  | 1.1285507629  | -0.472120428  |
| O  | 2.5553147238  | -0.4130556514 | 1.515488567   |
| O  | 3.3016489972  | -0.7156521516 | -1.1557275611 |
| C  | -2.2048241462 | 1.6930811315  | 1.0294830515  |
| C  | -2.8557375561 | 0.5632407053  | 1.5120232974  |
| C  | -3.3328473875 | -0.4097317341 | 0.6225673189  |
| C  | -3.1588221091 | -0.2351235771 | -0.7605792111 |
| C  | -2.5166892736 | 0.8942560131  | -1.2456699351 |
| C  | -2.0101525325 | 1.9066293439  | -0.3702214967 |
| H  | -1.8512024042 | 2.4337680847  | 1.7442719309  |
| H  | -3.008613374  | 0.4283597043  | 2.5822182736  |
| H  | -3.5299397071 | -0.9871519689 | -1.4569710614 |
| H  | -2.4005211777 | 1.0035292401  | -2.3224876989 |
| C  | -1.3506036058 | 3.0728158785  | -0.8709191307 |
| H  | 0.4004152513  | 0.9429220877  | -0.6354422409 |

|   |               |               |               |
|---|---------------|---------------|---------------|
| S | -4.1835288272 | -1.8815346139 | 1.2321582588  |
| O | -5.563512641  | -1.8301095228 | 0.6403683487  |
| O | -4.184028976  | -1.7733663147 | 2.7270020423  |
| O | -3.3912949474 | -3.0535159766 | 0.7280512499  |
| O | 3.4117207537  | -3.0826239518 | 2.1348175891  |
| H | 3.1657169214  | -2.1412022098 | 2.0443284305  |
| H | 2.5991787698  | -3.5579790872 | 1.9004414485  |
| H | 0.8910236408  | -2.2908332069 | -0.2017902659 |
| O | 4.1050832357  | -3.4552860355 | -0.6137714002 |
| H | 3.9681765736  | -2.5465524313 | -0.9412179176 |
| H | 4.1562968231  | -3.343468292  | 0.3571362552  |
| O | 3.138916197   | 3.2469246318  | -0.3333673536 |
| H | 3.8942594835  | 2.7920506054  | -0.7483771569 |
| H | 2.3968532808  | 2.6186974981  | -0.4466228281 |
| O | 5.3511106023  | 1.3549770256  | -0.7235030938 |
| H | 5.2558421577  | 1.4273249452  | 0.2458706009  |
| H | 4.7864863139  | 0.5951883028  | -0.9536950555 |
| O | 4.3029222794  | 1.8838982869  | 1.9253243396  |
| H | 3.8104690863  | 2.5156773672  | 1.3647632444  |
| H | 3.7269490797  | 1.0973297735  | 1.9484499454  |
| O | 0.2391758425  | -0.2977422511 | 3.1858222801  |
| H | 1.0302315932  | -0.347985898  | 2.6147725976  |
| H | -0.4968923865 | -0.1719008798 | 2.5730834954  |
| O | 2.703789965   | 0.4663175286  | -3.6661281235 |
| H | 2.0558165896  | 1.1480110204  | -3.4506374232 |
| H | 2.8963928507  | 0.0361440075  | -2.8097551244 |
| O | 0.6979334859  | -1.3358067608 | -0.3447269996 |
| C | -0.8231896409 | 4.1136067265  | 0.0741675001  |
| H | -0.1503290321 | 3.6797092066  | 0.8305599331  |
| H | -0.2701410902 | 4.8936932954  | -0.4602086573 |
| H | -1.6394889122 | 4.6063888294  | 0.6318784689  |
| C | -1.220178646  | 3.2991385215  | -2.3502364265 |
| H | -0.6504697768 | 2.4941127423  | -2.844287897  |
| H | -2.205421841  | 3.3263194931  | -2.8466408464 |
| H | -0.7120212296 | 4.2453660454  | -2.5645018905 |
| O | 1.4735395895  | -4.016801268  | 0.0345669608  |
| H | 2.3604220408  | -4.002921182  | -0.3914229904 |
| H | 0.9764601595  | -4.7382605223 | -0.3693307047 |

## TS2

|    |             |             |             |
|----|-------------|-------------|-------------|
| Fe | -2.08075300 | -0.40673100 | -0.29546500 |
| O  | -0.80666300 | 0.85247500  | -0.48924600 |
| O  | -3.52647100 | 0.07707900  | -0.88660700 |
| O  | -2.03557700 | -1.06614900 | 1.19863000  |

|   |             |             |             |
|---|-------------|-------------|-------------|
| C | 2.86683500  | 1.17238500  | -1.60092700 |
| C | 3.90679500  | 0.27910300  | -1.36947400 |
| C | 4.32508300  | 0.01200300  | -0.06070300 |
| C | 3.69018200  | 0.65031500  | 1.01848100  |
| C | 2.65176300  | 1.53963800  | 0.78873400  |
| C | 2.19501700  | 1.83917900  | -0.53313400 |
| H | 2.57313500  | 1.36200300  | -2.63111200 |
| H | 4.40285400  | -0.21598000 | -2.20252400 |
| H | 4.01098400  | 0.44675700  | 2.03988200  |
| H | 2.18240100  | 2.01287300  | 1.64799100  |
| H | -0.15014100 | 0.45610300  | -1.08296100 |
| S | 5.69298700  | -1.12535700 | 0.25973700  |
| O | 6.79641100  | -0.27803100 | 0.82600400  |
| O | 6.04540600  | -1.73609600 | -1.06207700 |
| O | 5.17145500  | -2.12310300 | 1.25215500  |
| O | -5.62576100 | -1.63361100 | -0.28769900 |
| H | -4.92473700 | -1.00707300 | -0.57121400 |
| H | -6.01303300 | -1.97986100 | -1.10306200 |
| H | -1.70902600 | -2.35425800 | -1.47270200 |
| O | -3.77745700 | -3.32512100 | 0.97574700  |
| H | -3.14258600 | -2.61938500 | 1.20989300  |
| H | -4.55205000 | -2.83190500 | 0.62745300  |
| O | -2.89513000 | 3.01955400  | 2.71747600  |
| H | -2.98247300 | 2.07661100  | 2.97394800  |
| H | -1.94822500 | 3.16608300  | 2.61117300  |
| O | -3.70310000 | 0.36133700  | 2.98427700  |
| H | -4.36261800 | 0.68918800  | 2.34457000  |
| H | -3.09985000 | -0.18002500 | 2.43141900  |
| O | -4.89577900 | 1.93244900  | 0.78642000  |
| H | -4.23745300 | 2.53106300  | 1.18223600  |
| H | -4.39741900 | 1.38927200  | 0.14363600  |
| O | -3.98511400 | 0.82546100  | -3.52089800 |
| H | -3.77026200 | 0.58373600  | -2.59437000 |
| H | -3.53764300 | 1.66807500  | -3.66911300 |
| O | 0.51807800  | -1.13754800 | 2.35933400  |
| H | 1.07228700  | -0.55105400 | 1.82908700  |
| H | -0.36230300 | -1.10896300 | 1.92947900  |
| O | -1.26124900 | -1.47771700 | -1.44450100 |
| O | -2.52536500 | -3.98705300 | -1.37180600 |
| H | -2.99281700 | -3.87996400 | -0.50769600 |
| H | -1.91978000 | -4.72948700 | -1.25623300 |
| C | 1.12625400  | 2.76281100  | -0.78323000 |
| C | 0.70335200  | 3.10454700  | -2.18145800 |
| H | -0.30619500 | 3.53323800  | -2.18607200 |

|   |             |            |             |
|---|-------------|------------|-------------|
| H | 1.38067200  | 3.86805500 | -2.60661200 |
| H | 0.71635200  | 2.24890300 | -2.86683100 |
| C | 0.53650500  | 3.62904800 | 0.28349600  |
| H | 0.88359800  | 4.67053900 | 0.15323800  |
| H | -0.55790500 | 3.65422000 | 0.18699100  |
| H | 0.79584100  | 3.31637700 | 1.29741700  |

### INT3

|    |               |               |               |
|----|---------------|---------------|---------------|
| Fe | -2.2686647359 | 0.309811044   | 0.5413413196  |
| O  | -0.2683317452 | -0.3207864956 | 1.0305103133  |
| O  | -3.3296447156 | -0.9576474019 | 0.7091888665  |
| O  | -2.5386202564 | 1.2775546048  | -0.7837130131 |
| C  | 3.2019493251  | -1.4348233288 | 0.9618902574  |
| C  | 4.4655963753  | -0.8736733828 | 0.7441730423  |
| C  | 4.576220121   | 0.3379009108  | 0.0639215243  |
| C  | 3.4275788603  | 0.9893121524  | -0.4035122177 |
| C  | 2.1742150806  | 0.4221720597  | -0.1850492151 |
| C  | 2.0420994855  | -0.7991174068 | 0.5023343664  |
| H  | 3.1394361476  | -2.3805063725 | 1.4971831823  |
| H  | 5.3628690842  | -1.3732583452 | 1.1054217969  |
| H  | 3.5104045946  | 1.9368392646  | -0.9357261412 |
| H  | 1.2875659964  | 0.9398900154  | -0.5495185897 |
| H  | -0.0317519356 | 0.1002770306  | 1.8694713932  |
| S  | 6.2004599233  | 1.0917000956  | -0.2183987567 |
| O  | 6.3349494071  | 1.2209768526  | -1.7079190496 |
| O  | 7.2045062552  | 0.1557199733  | 0.3822509844  |
| O  | 6.1539413558  | 2.4244320321  | 0.4712532443  |
| O  | -5.9248032642 | -0.1376389557 | 0.5008246982  |
| H  | -5.0053226009 | -0.4832957847 | 0.6328748305  |
| H  | -6.3708562803 | -0.2423872411 | 1.3497419231  |
| H  | -2.8150852485 | 1.8863846647  | 2.194054121   |
| O  | -5.0169377452 | 2.4229861684  | -0.2028061491 |
| H  | -4.1332096331 | 2.1106910147  | -0.5062204622 |
| H  | -5.4890317541 | 1.5870117828  | 0.0023738389  |
| O  | -2.1156902077 | -2.1701178308 | -3.6522679989 |
| H  | -2.5033818963 | -1.2736142712 | -3.5426497264 |
| H  | -1.1593307243 | -2.0556076338 | -3.6028461071 |
| O  | -3.6953006739 | 0.0014495096  | -2.9464045101 |
| H  | -4.1642062348 | -0.7230387727 | -2.4930905876 |
| H  | -3.2717969899 | 0.4961650995  | -2.2056082186 |
| O  | -4.0512702094 | -2.5060529103 | -1.5065229482 |
| H  | -3.272773268  | -2.6537337244 | -2.0718053565 |
| H  | -3.7199011902 | -2.0244864064 | -0.717134556  |
| O  | -3.066679534  | -2.8841710664 | 2.6511877199  |

|   |               |               |               |
|---|---------------|---------------|---------------|
| H | -3.144974057  | -2.1736888386 | 1.9726961709  |
| H | -3.9667775746 | -3.0348851751 | 2.9601369774  |
| O | -0.3449512747 | 2.5573736433  | -1.8502746591 |
| H | -0.6996666299 | 3.2732549607  | -2.3889836515 |
| H | -1.13299698   | 2.111808827   | -1.4610280969 |
| O | -2.0530143259 | 1.2970068655  | 2.0120445215  |
| O | -4.2626641503 | 3.0506113812  | 2.3438568302  |
| H | -4.5948343258 | 2.9371666081  | 1.4179586974  |
| H | -4.0272398662 | 3.9822687689  | 2.4288904602  |
| C | 0.6463712015  | -1.4044007729 | 0.6933014918  |
| C | 0.5700177557  | -2.4482348898 | 1.8094564181  |
| H | -0.4775156138 | -2.7274306837 | 1.9694419705  |
| H | 1.1293902831  | -3.3539759749 | 1.5443091166  |
| H | 0.9757290696  | -2.0550687494 | 2.7513125936  |
| C | 0.1314161559  | -1.979548673  | -0.6295820071 |
| H | 0.7980864694  | -2.7801774911 | -0.970895957  |
| H | -0.8765155037 | -2.3924931545 | -0.4981432075 |
| H | 0.099851378   | -1.200032456  | -1.400636788  |
